# Supplementary material for: Qualitative analysis of COACH: A community-based behavioral intervention to reduce obesity health disparities within a marginalized community
Source: PubMed Central journal article supplement — Contemp Clin Trials Commun. 2019 Sep 25;16:100452. doi: 10.1016/j.conctc.2019.100452 (PMC6804499; doi:10.1016/j.conctc.2019.100452), 2019-09-25
Supplement: mmc2.pdf [file mmc2.pdf]

| Code     | Category                            | Description                                                                                                                                                                                         |
|----------|-------------------------------------|-----------------------------------------------------------------------------------------------------------------------------------------------------------------------------------------------------|
| <b>1</b> | <b>Behavior Change Goals</b>        | <b>Changes that participant made for her/his family because of COACH</b>                                                                                                                            |
| 1.1      | Physical activity                   | Increased physical activity, going outside, playing with others                                                                                                                                     |
| 1.1.1    | Non-exercise activities             | Good non-exercise/active leisure activities they are doing as a result of COACH                                                                                                                     |
| 1.2      | Nutrition                           | Changes in food choices and eating behaviors, including beverages                                                                                                                                   |
| 1.2.1    | Incorporate/increase                | Positive changes that make the diet healthier                                                                                                                                                       |
| 1.2.1.1  | Food preparation modification       | Learning new preparation techniques, using healthy recipes, adapting recipes to cultural preferences or childrens' preferences                                                                      |
| 1.2.1.2  | Increase fruits and vegetables      | Strategies to eat more fruit and eat more vegetables                                                                                                                                                |
| 1.2.1.3  | Increase water                      | Drinking more water at meals or between meals.                                                                                                                                                      |
| 1.2.1.4  | Model healthy behavior              | Parents model (or explicitly teach) others (children, friends, etc) how to be healthier                                                                                                             |
| 1.2.1.5  | Children leading                    | Children are models/motivators for parents to maintain healthy behavior, or at least can maintain healthy behavior on their own                                                                     |
| 1.2.1.6  | Nutrition and health knowledge      | More knowledgeable about food contents, ingredients, health, and healthy eating                                                                                                                     |
| 1.2.1.7  | Healthy snacking                    | Comments about eating healthier snacks                                                                                                                                                              |
| 1.2.1.8  | Shopping strategies                 | Strategies used when shopping to eat healthier                                                                                                                                                      |
| 1.2.1.9  | Other specified increases           | Other eating behaviors that should be increased                                                                                                                                                     |
| 1.2.2    | Eliminate/decrease                  | Eating behaviors that should be eliminated or reduced in frequency.                                                                                                                                 |
| 1.2.2.1  | Reduce sugar intake                 | Includes desserts and sugary drinks (juices, sodas, etc)                                                                                                                                            |
| 1.2.2.2  | Moderation                          | Consuming unhealthy foods/drinks only in moderation                                                                                                                                                 |
| 1.2.2.3  | Other specified reductions          | Other behaviors or eating habits that should be decreased in frequency                                                                                                                              |
| 1.3      | Family interactions                 | General changes in family interaction, family function, family routines, and family support                                                                                                         |
| 1.3.1    | Behaviors to increase               | Things that went well and/or they want to do more often with family                                                                                                                                 |
| 1.3.2    | Behaviors to decrease               | Things that were challenges and/or they want to do less often with family                                                                                                                           |
| 1.4      | Parenting                           | Changing specific interactions with children in order to improve quality of parenting                                                                                                               |
| 1.4.1    | Rules                               | Placing limits on things, tying things that the kids want to whether they eat healthy/do what the parents want                                                                                      |
| 1.4.2    | Other behaviors to increase         | Other beneficial outcomes related to parenting                                                                                                                                                      |
| 1.4.3    | Challenges                          | Challenges/things they want to do less regarding parenting                                                                                                                                          |
| 1.5      | Media use/technology                |                                                                                                                                                                                                     |
| 1.5.1    | Behaviors to increase               | Things that went well and/or they want to do more often with as part of media and technology use                                                                                                    |
| 1.5.2    | Behaviors to decrease               | Things that were challenges and/or they want to do less often with as part of media and technology use                                                                                              |
| 1.6      | Sleep                               | Changes in sleep hygiene                                                                                                                                                                            |
| 1.7      | Health goals                        | Discussion of overall health outcomes that are part of the family's goals, such as weight loss or improving general wellbeing.                                                                      |
| 1.7.1    | Obesity/weight                      | Specific mention of weight loss or preventing weight gain                                                                                                                                           |
| 1.7.2    | Mental health quality of life       | Discusses psychological or emotional wellbeing.                                                                                                                                                     |
| 1.7.3    | Self-efficacy                       | Improved self-efficacy/confidence/motivation/etc                                                                                                                                                    |
| 1.7.4    | Health over time                    | Discusses effect of actions now on health later                                                                                                                                                     |
| 1.7.5    | Doctor                              | Listening to/trusting their doctor                                                                                                                                                                  |
| 1.7.6    | Other specified health              | Discusses awareness, concerns, or COACH's impact on other specific health issues or general well-being                                                                                              |
| 1.8      | Community impact                    | Discusses impact of COACH beyond the immediate family, especially in their community/neighborhood                                                                                                   |
| 1.9      | Literacy and school readiness       | Changes related to reading and school readiness                                                                                                                                                     |
| 1.9.1    | Reading strategies                  | Parents' strategies for helping child with reading or being excited about reading                                                                                                                   |
| 1.9.2    | Excited about reading               | Likes to read more/more excited about reading                                                                                                                                                       |
| 1.9.3    | School engagement                   | Child is more engaged with/doing better at school                                                                                                                                                   |
| 1.9.4    | Library                             | More use of school/local library or other sources of books                                                                                                                                          |
| 1.10     | Religion                            | Discussed relevance of religion to good COACH outcomes                                                                                                                                              |
| <b>2</b> | <b>Barriers</b>                     | <b>Barriers to behavior change</b>                                                                                                                                                                  |
| 2.1      | General barriers                    | Any general, non-specific barriers discussed                                                                                                                                                        |
| 2.2      | Child behavior/misbehavior          | The way the child responds to behavior change efforts makes it difficult for changes to occur e.g., child has temper tantrum. Child's preferences or desires are opposed to making behavior change. |
| 2.3      | Family support                      | Actions or lack of action from spouse and/or extended family create difficulties for making or maintaining behaviors changes.                                                                       |
| 2.4      | Physical or built environment       | Access to or quality of resources in the environment create problems for behavior change.                                                                                                           |
| 2.5      | Competing priorities                | Family or family members have two or more goals or interests that compete for their time, attention, effort, money, and make it more difficult to change behavior or maintain behavior change.      |
| 2.6      | Financial                           | Not having enough money or resources, or healthy alternatives being too expensive.                                                                                                                  |
| 2.7      | Emotional or psychological barriers | Use this when explanations of difficulty refer to emotional states (e.g., stress) or are attributed to personal traits or characteristics or motivations (e.g., not motivated, lazy)                |
| 2.8      | Culture                             | Barriers related to cultural practices or background                                                                                                                                                |
| 2.9      | Personal preference/ability         | Barrier was related to the participant just not liking or being physically able to do something                                                                                                     |
| 2.10     | Other specific barriers             | Other barriers to behavior change that cannot be categorized above.                                                                                                                                 |
| <b>3</b> | <b>Programmatic elements</b>        | <b>Discussion of specific aspects of the COACH intervention</b>                                                                                                                                     |
| 3.1      | General comments                    | Any general comment about the COACH intervention                                                                                                                                                    |
| 3.1.1    | General positive comments           | Any general positive comment about the COACH intervention                                                                                                                                           |
| 3.1.2    | General negative comments           | Any general negative about the COACH intervention                                                                                                                                                   |
| 3.2      | Social/cultural element             | Discussion of the group process, interaction with other participants, and COACH's culture-specific impact                                                                                           |
| 3.3      | Learning topics                     | Discussion of the specific topics that were addressed by the program. The focus is on the process of learning or the <i>content of the curriculum</i> .                                             |
| 3.3.1    | Healthy diet                        | Discussion of the topic or process of learning about healthy diet as part of the COACH program                                                                                                      |
| 3.3.2    | Physical activity                   | Discussion of the topic or process of learning about physical activity as part of the COACH program                                                                                                 |
| 3.3.3    | Sleep                               | Discussion of the topic or process of learning about sleep as part of the COACH program                                                                                                             |
| 3.3.4    | Engaged parenting                   | Discussion of the topic or process of learning about engaged parenting as part of the COACH program                                                                                                 |
| 3.3.5    | Media use                           | Discussion of the topic or process of learning about changing media use as part of the COACH program                                                                                                |
| 3.3.6    | Literacy and school readiness       | Discussion of the topic or process of learning about literacy as part of the COACH program                                                                                                          |
| 3.4      | Staff                               | Discussion about the kind and/or quality of interaction with program staff                                                                                                                          |
| 3.5      | Goal setting                        | Discussion of the process for setting goals for behavior change and being accountable to them                                                                                                       |
| 3.6      | Coaching calls                      | Discussion of the post-intervention coaching calls                                                                                                                                                  |
| 3.7      | Gift Cards                          | Discussed the financial incentives and compensation aspect of the program                                                                                                                           |
| 3.8      | What is missing                     | Discusses what they need or what is missing that would help them change/maintain behavior change. Also included suggestions about adding to or improving the content of the COACH program.          |
| 3.8.1    | Wants it to continue                | Expressed interest in COACH continuing, doing COACH again, or having their friends do it                                                                                                            |
| 3.9      | Other                               | Other specific comments about the COACH intervention                                                                                                                                                |
| <b>4</b> | <b>Outcomes</b>                     | <b>Overall discussion of the results or impact of the COACH program.</b>                                                                                                                            |
| 4.1      | Positive outcomes                   | Discusses changes or outcomes that are considered good or desirable.                                                                                                                                |
| 4.2      | Negative outcomes                   | Discusses changes or outcomes that are considered poor or undesirable.                                                                                                                              |
| <b>5</b> | <b>Strategies</b>                   | <b>Strategy to overcome barrier</b>                                                                                                                                                                 |
| 5.1      | Strategy to overcome a barrier      | Discusses a strategy they used to overcome a barrier                                                                                                                                                |
| <b>9</b> | <b>Group</b>                        |                                                                                                                                                                                                     |
| 9.1      | Intervention                        | Response came from an intervention focus group                                                                                                                                                      |
| 9.2      | Control                             | Response came from a control focus group                                                                                                                                                            |
